# Supplementary material
Source: Springer Nature journal article supplement (https://www.springermedizin.de/resource/supplementary/12936_2013_2730_MOESM1_ESM.pdf/9544142)

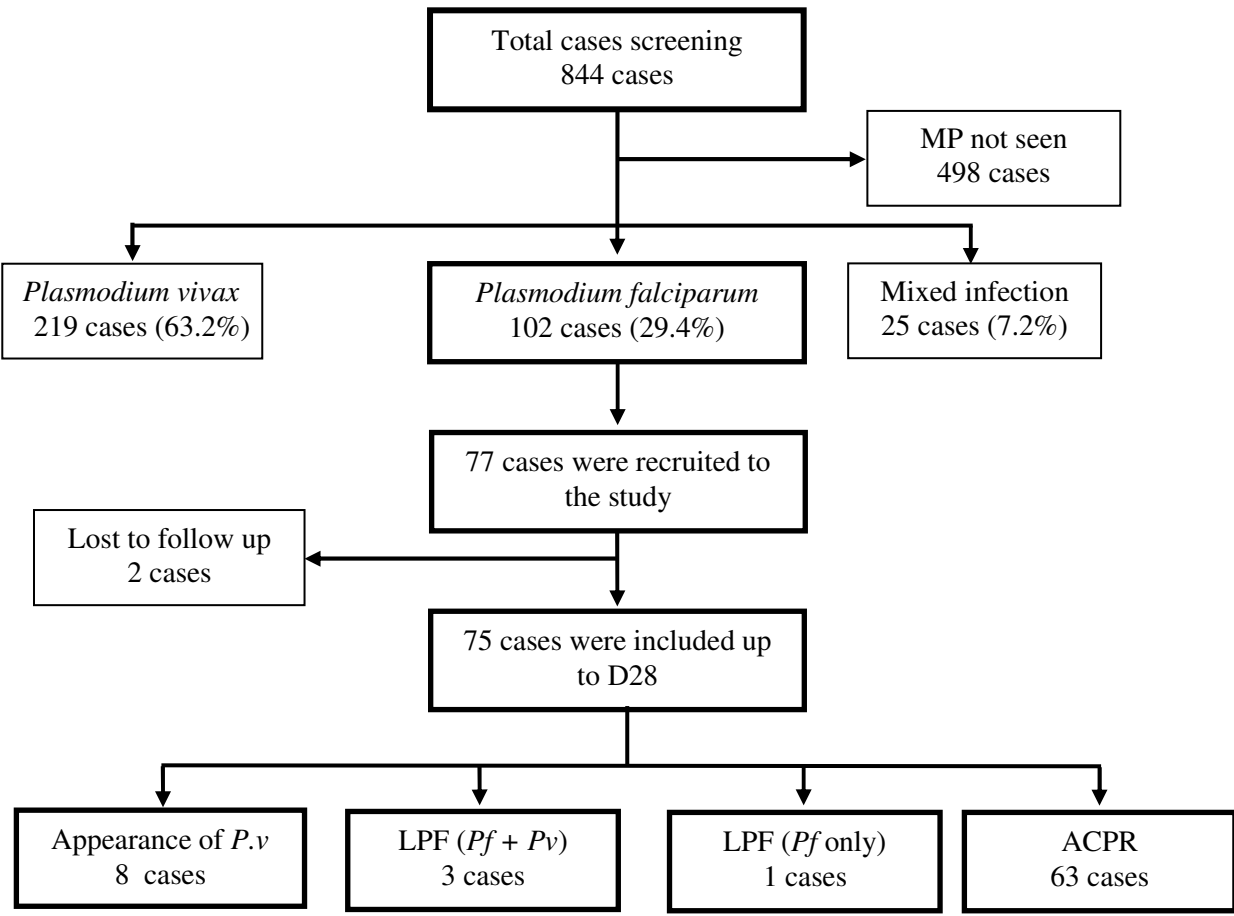

Supplement: MOESM1 [file 9544142]
